# Supplementary material for: Phosphorus-containing polymers from tetrakis-(hydroxymethyl)phosphonium sulfateiii. A new hydrolysis-resistant tris(allyloxymethyl)phosphine oxide and its thiol-ene reaction under ultraviolet irradiation
Source: Royal Society of Chemistry journal article supplement (doi:10.1039/c4ra06080f), 2014-08-13
Supplement: c4ra06080f1.pdf [file c4ra06080f1.pdf]

## Supporting Information

For *RSC Advances*

### Phosphorus-containing polymers from tetrakis(hydroxymethyl)phosphonium sulfate. III. A new hydrolysis-resistant tris(allyloxymethyl)phosphine oxide and its thiol-ene reaction under ultraviolet irradiation

Zhiwei Tan<sup>a,c</sup>, Chengyan Wu<sup>a</sup>, Min Zhang<sup>a</sup>, Wenzhong Lv<sup>b</sup>, Jinjun Qiu<sup>a</sup>, Chengmei Liu<sup>a\*</sup>

<sup>a</sup> School of Chemistry and Chemical Engineering, Key Laboratory for Large-Format Battery Materials and System, Ministry of Education, Huazhong University of Science and Technology, Wuhan, 430074, China

<sup>b</sup>Department of Electronic Science and Technology, Huazhong University of Science and Technology, Wuhan, 430074, China

<sup>c</sup>School of Chemistry and Environmental Engineering, Hubei University for Nationalities, Enshi, 445000, China

\*Corresponding author. Tel: 86-27-87559627. E-mail: liukui@mail.hust.edu.cn

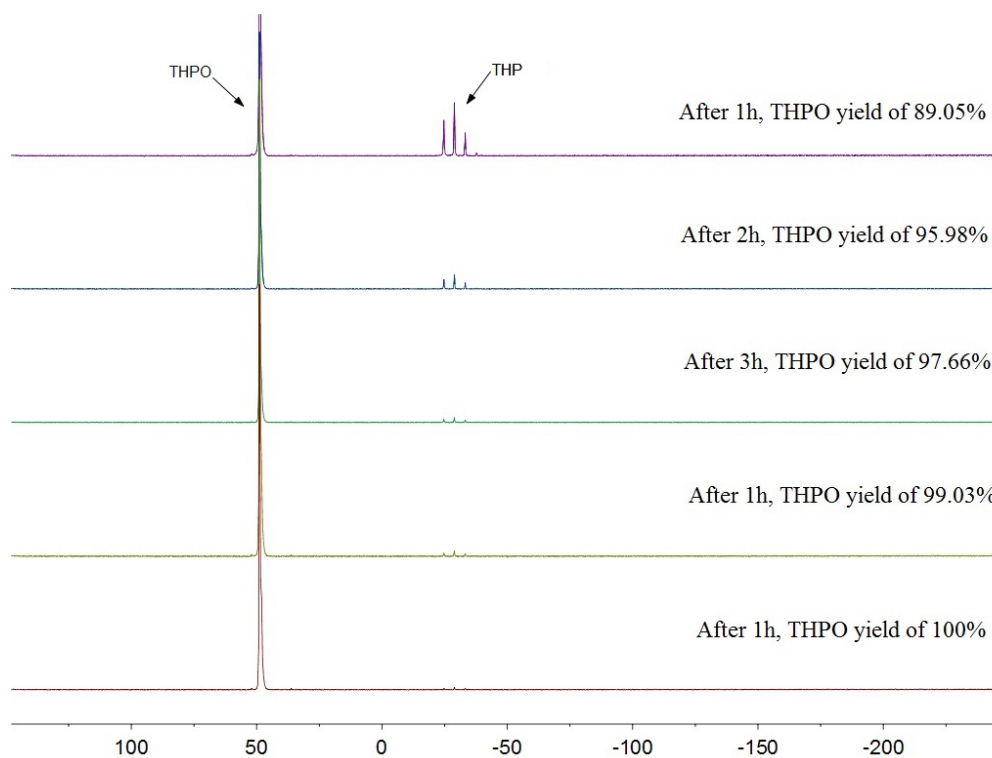

Figure S1. <sup>31</sup>P NMR spectrum of reaction mixture at one hour interval.
